# Supplementary material for: The Fox and the Grapes—How Physical Constraints Affect Value Based Decision Making
Source: PLOS journal article supplement (doi:10.1371/journal.pone.0127619), 2015-06-10

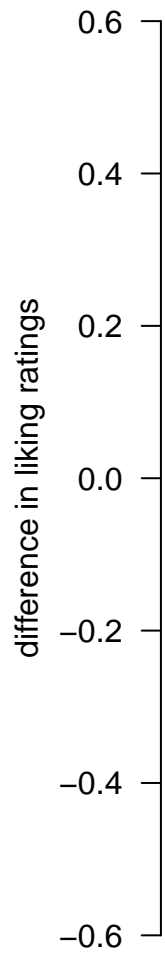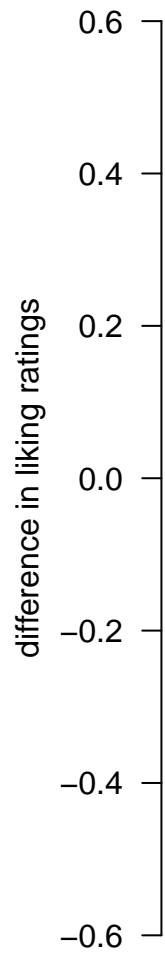

Supplement: S5 (10.1371/journal.pone.0127619.s005) [file journal.pone.0127619.s005]
