# Supplementary material for: The Fox and the Grapes—How Physical Constraints Affect Value Based Decision Making
Source: PLOS journal article supplement (doi:10.1371/journal.pone.0127619), 2015-06-10
Supplement: S10 (10.1371/journal.pone.0127619.s010) [file journal.pone.0127619.s010]

**Table S1**

Stimuli used in the computer condition. For each item, names and descriptions (in parentheses) were presented together on the computer screen. Snack foods in the same row comprise pairs.

| <b>Name</b>                                   | <b>Name</b>                                 |
|-----------------------------------------------|---------------------------------------------|
| Digestive Mini's Milk Chocolate*<br>(Cookies) | Choc Chip Mini's*<br>(Cookies)              |
| Salty Liquorice<br>(Liquorice)                | Sweet Liquorice<br>(Liquorice)              |
| Soft Fruitbears<br>(Fruitgum)                 | Fruity Winegums<br>(Fruitgum)               |
| Haribo Happy Cola<br>(Fruitgum)               | Haribo Happy Cherries<br>(Fruitgum)         |
| Haribo Gummibears<br>(Fruitgum)               | Fruity Bottles<br>(Fruitgum)                |
| Jelly Beans<br>(Fruit Candy)                  | Skittles<br>(Fruit Candy)                   |
| Bounty<br>(Chocolate Bar)                     | Bounty Dark<br>(Chocolate Bar)              |
| Cote d'or BonBonBloc Praline<br>(Chocolate)   | Bitter Chocolate with Orange<br>(Chocolate) |
| Kinder Bueno<br>(Chocolate Bar)               | Rolo<br>(Chocolates with Caramel)           |
| KitKat<br>(Chocolate Bar)                     | KitKat Chunky*<br>(Chocolate Bar)           |
| Choco M&Ms<br>(Chocolate Candy)               | Maltesers<br>(Chocolate Candy)              |

*Note.* \*These items were not identical but close substitutes to items in the physical condition, all other items were identical across the two conditions.

**Table S1 (continued)**

Stimuli used in the computer condition. For each item, names and descriptions (in parentheses) were presented together on the computer screen. Snack foods in the same row comprise pairs.

| <b>Name</b>                              | <b>Name</b>                        |
|------------------------------------------|------------------------------------|
| Mars<br>(Chocolate Bar)                  | Snickers<br>(Chocolate Bar)        |
| Milka Milk<br>(Chocolate)                | Milka Cream<br>(Chocolate)         |
| Twix<br>(Chocolate Bar)                  | Lion<br>(Chocolate Bar)            |
| Bugles Cheese<br>(Nacho Chips)           | Chio Cheese<br>(Potato Chips)      |
| Lay's Paprika<br>(Potato Chips)          | Lay's Natural<br>(Potato Chips)    |
| Fun Mix<br>(Salty Crackers)              | Trio Zoutjes<br>(Salty Crackers)   |
| Kaas Zoutjes*<br>(Cheese Crackers)       | Snack Zoutjes*<br>(Salty Crackers) |
| Tuc Cheese<br>(Crackers)                 | Tuc Naturel<br>(Crackers)          |
| Thai Sweet Chili Nuts<br>(Spicy Peanuts) | Katjang Pedis<br>(Spicy Peanuts)   |
| Cashews<br>(Nuts)                        | Pistachios<br>(Nuts)               |
| Nut and Raisins Mix<br>(Nuts)            | Nut Mix<br>(Nuts)                  |

*Note.* \*These items were not identical but close substitutes to items in the physical condition, all other items were identical across the two conditions.
