# Supplementary material for: The Fox and the Grapes—How Physical Constraints Affect Value Based Decision Making
Source: PLOS journal article supplement (doi:10.1371/journal.pone.0127619), 2015-06-10
Supplement: S11 (10.1371/journal.pone.0127619.s011) [file journal.pone.0127619.s011]

**Table S2**

Random intercept regression model with control variables.  
 Dependent variable: wanting ratings.

|                                          | <b>Coef.</b> | <b>95% CI</b>  | <b>p</b> |
|------------------------------------------|--------------|----------------|----------|
| constant (computer condition, no weight) | 0.45         | [0.30, 0.61]   | < 0.01   |
| physical condition                       | 0.10         | [-0.11, 0.32]  | 0.35     |
| weight                                   | 0.14         | [-0.00, 0.28]  | 0.06     |
| physical $\times$ weight                 | -0.21        | [-0.41, -0.02] | 0.03     |
| familiarity                              | 0.35         | [0.28, 0.41]   | < 0.01   |
| order of weight condition                | 0.29         | [0.02, 0.57]   | 0.04     |
| order $\times$ weight                    | -0.26        | [-0.47, -0.05] | 0.01     |
| order $\times$ physical                  | 0.11         | [-0.30, 0.53]  | 0.59     |
| order $\times$ physical $\times$ weight  | 0.22         | [-0.08, 0.52]  | 0.15     |
| $\sigma_u$ (SD between subjects)         | 0.31         |                |          |
| $\sigma_e$ (SD within subjects)          | 0.88         |                |          |

*Note.* 2200 trials, nested within 50 subjects. Standard errors are corrected for potential heteroscedasticity and autocorrelations at the subject level. All p values are two-sided. Order indicates whether participant started with the weight (Order = 1) or no weight condition (Order = 0).
