# Supplementary material for: The Fox and the Grapes—How Physical Constraints Affect Value Based Decision Making
Source: PLOS journal article supplement (doi:10.1371/journal.pone.0127619), 2015-06-10
Supplement: S12 (10.1371/journal.pone.0127619.s012) [file journal.pone.0127619.s012]

**Table S3**

Random intercept regression model with control variables.  
Dependent variable: liking ratings.

|                                          | <b>Coef.</b> | <b>95% CI</b>  | <b>p</b> |
|------------------------------------------|--------------|----------------|----------|
| constant (computer condition, no weight) | 0.81         | [0.65, 0.98]   | < 0.01   |
| physical condition                       | -0.07        | [-0.32, 0.19]  | 0.60     |
| weight                                   | 0.09         | [-0.02, 0.20]  | 0.11     |
| physical $\times$ weight                 | -0.13        | [-0.29, 0.02]  | 0.08     |
| familiarity                              | 0.35         | [0.30, 0.41]   | < 0.01   |
| order of weight condition                | 0.06         | [-0.23, 0.34]  | 0.70     |
| order $\times$ weight                    | -0.19        | [-0.33, -0.04] | 0.01     |
| order $\times$ physical                  | 0.27         | [-0.13, 0.67]  | 0.19     |
| order $\times$ physical $\times$ weight  | 0.09         | [-0.14, 0.33]  | 0.44     |
| $\sigma_u$ (SD between subjects)         | 0.33         |                |          |
| $\sigma_e$ (SD within subjects)          | 0.85         |                |          |

*Note.* 2200 trials, nested within 50 subjects. Standard errors are corrected for potential heteroscedasticity and autocorrelations at the subject level. All p values are two-sided. Order indicates whether participant started with the weight (Order = 1) or no weight condition (Order = 0).
